# Supplementary material for: TTC30A and TTC30B Redundancy Protects IFT Complex B Integrity and Its Pivotal Role in Ciliogenesis
Source: MDPI journal article supplement (doi:10.3390/genes13071191), 2022-07-01
Supplement: s1 [file s1]

Supplementary Figure S2

I. MaxQuant settings for TTC30A/B protein identification

|                                          |                                     |                                             |        |
|------------------------------------------|-------------------------------------|---------------------------------------------|--------|
| PARAMETER                                | VALUE                               | Max. peptide mass [Da]                      | 4600   |
| VERSION                                  | 1.6.0.16                            | Min. peptide length for unspecific search   | 8      |
| USER NAME                                | MPCADMIN                            | Max. peptide length for unspecific search   | 25     |
| MACHINE NAME                             | ADMIN-PC                            | Razor protein FDR                           | True   |
| DATE OF WRITING                          | 02/16/2019 20:05:05                 | Disable MD5                                 | False  |
| FIXED MODIFICATIONS                      | CARBAMIDOMETHYL (C)                 | Max mods in site table                      | 3      |
| INCLUDE CONTAMINANTS                     | TRUE                                | Match unidentified features                 | True   |
| PSM FDR                                  | 0.01                                | MS/MS tol. (FTMS)                           | 20 ppm |
| PROTEIN FDR                              | 0.01                                | Top MS/MS peaks per Da interval. (FTMS)     | 12     |
| SITE FDR                                 | 0.01                                | Da interval. (FTMS)                         | 100    |
| USE NORMALIZED RATIOS FOR OCCUPANCY      | TRUE                                | MS/MS deisotoping (FTMS)                    | True   |
| MIN. PEPTIDE LENGTH                      | 7                                   | MS/MS deisotoping tolerance (FTMS)          | 7      |
| MIN. SCORE FOR UNMODIFIED PEPTIDES       | 0                                   | MS/MS deisotoping tolerance unit (FTMS) ppm |        |
| MIN. SCORE FOR MODIFIED PEPTIDES         | 40                                  | MS/MS higher charges (FTMS)                 | True   |
| MIN. DELTA SCORE FOR UNMODIFIED PEPTIDES | 0                                   | MS/MS water loss (FTMS)                     | True   |
| MIN. DELTA SCORE FOR MODIFIED PEPTIDES   | 6                                   | MS/MS ammonia loss (FTMS)                   | True   |
| MIN. UNIQUE PEPTIDES                     | 0                                   | MS/MS dependent losses (FTMS)               | True   |
| MIN. RAZOR PEPTIDES                      | 1                                   | MS/MS recalibration (FTMS)                  | False  |
| MIN. PEPTIDES                            | 1                                   | MS/MS tol. (ITMS)                           | 0.5 Da |
| USE ONLY UNMODIFIED PEPTIDES AND FALSE   |                                     | Top MS/MS peaks per Da interval. (ITMS)     | 8      |
| PEPTIDES USED FOR PROTEIN QUANTIFICATION | RAZOR                               | Da interval. (ITMS)                         | 100    |
| DISCARD UNMODIFIED COUNTERPART PEPTIDES  | TRUE                                | MS/MS deisotoping (ITMS)                    | False  |
| LABEL MIN. RATIO COUNT                   | 2                                   | MS/MS deisotoping tolerance (ITMS)          | 0.15   |
| USE DELTA SCORE                          | FALSE                               | MS/MS deisotoping tolerance unit (ITMS) Da  |        |
| IBAQ                                     | FALSE                               | MS/MS higher charges (ITMS)                 | True   |
| IBAQ LOG FIT                             | FALSE                               | MS/MS water loss (ITMS)                     | True   |
| MATCH BETWEEN RUNS                       | TRUE                                | MS/MS ammonia loss (ITMS)                   | True   |
| MATCHING TIME WINDOW [MIN]               | 0.7                                 | MS/MS dependent losses (ITMS)               | True   |
| ALIGNMENT TIME WINDOW [MIN]              | 20                                  | MS/MS recalibration (ITMS)                  | False  |
| FIND DEPENDENT PEPTIDES                  | FALSE                               | MS/MS tol. (TOF)                            | 40 ppm |
| FASTA FILE                               | C:\DATABASES\SP-HUMAN-2014-11.FASTA | Top MS/MS peaks per Da interval. (TOF)      | 10     |
| DECOY MODE                               | REVERT                              | Da interval. (TOF)                          | 100    |
| INCLUDE CONTAMINANTS                     | TRUE                                | MS/MS deisotoping (TOF)                     | True   |
| ADVANCED RATIOS                          | TRUE                                | MS/MS deisotoping tolerance (TOF)           | 0.01   |
| FIXED ANDROMEDA INDEX FOLDER             |                                     | MS/MS deisotoping tolerance unit (TOF) Da   |        |
| TEMPORARY FOLDER                         |                                     | MS/MS higher charges (TOF)                  | True   |

|                                             |                                            |                        |
|---------------------------------------------|--------------------------------------------|------------------------|
| COMBINED FOLDER LOCATION                    | MS/MS water loss (TOF)                     | True                   |
| SECOND PEPTIDES TRUE                        | MS/MS ammonia loss (TOF)                   | True                   |
| STABILIZE LARGE LFQ RATIOS TRUE             | MS/MS dependent losses (TOF)               | True                   |
| SEPARATE LFQ IN PARAMETER GROUPS FALSE      | MS/MS recalibration (TOF)                  | False                  |
| REQUIRE MS/MS FOR LFQ                       | MS/MS tol. (Unknown)                       | 0.5 Da                 |
| COMPARISONS FALSE                           | Top MS/MS peaks per Da interval. (Unknown) | 8                      |
| CALCULATE PEAK PROPERTIES FALSE             | Da interval. (Unknown)                     | 100                    |
| MAIN SEARCH MAX. COMBINATIONS 200           | MS/MS deisotoping (Unknown)                | False                  |
| ADVANCED SITE INTENSITIES TRUE              | MS/MS deisotoping tolerance (Unknown)      | 0.15                   |
| LFQ NORM FOR SITES AND PEPTIDES FALSE       | MS/MS deisotoping tolerance unit (Unknown) | Da                     |
| WRITE MSSCANS TABLE TRUE                    | MS/MS higher charges (Unknown)             | True                   |
| WRITE MSMSSCANS TABLE TRUE                  | MS/MS water loss (Unknown)                 | True                   |
| WRITE MS3SCANS TABLE FALSE                  | MS/MS ammonia loss (Unknown)               | True                   |
| WRITE ALLPEPTIDES TABLE TRUE                | MS/MS dependent losses (Unknown)           | True                   |
| WRITE MZRANGE TABLE FALSE                   | MS/MS recalibration (Unknown)              | False                  |
| WRITE PASEFMSMSSCANS TABLE FALSE            | Site tables                                | Oxidation (M)Sites.txt |
| WRITE ACCUMULATEDPASEFMSMSSCANS TABLE FALSE |                                            |                        |

An overview of the MaxQuant settings used for quantitative analysis of acquired mass spectrometry data sets.

## II. Specific TTC30A/B peptide sequences and ratios

| peptide sequence                     | specificity | TTC30A_x/y_TTC30B |
|--------------------------------------|-------------|-------------------|
| AGLSGAQIPDGEFTALVYR                  | TTC30A      | 25.64221          |
| ALIYEIIGWNK                          | TTC30A      | 26.56001          |
| EEEQLSYDDPNR                         | TTC30A      | 23.57260          |
| EEEQLSYDDPNRK                        | TTC30A      | 26.29461          |
| GNYEFGISR                            | TTC30A      | 27.89663          |
| IEKEEEQLSYDDPNR                      | TTC30A      | 22.45543          |
| IEKEEEQLSYDDPNRK                     | TTC30A      | 23.60411          |
| KIEKEEEQLSYDDPNR                     | TTC30A      | 25.73300          |
| LDGLAGMLTEQLR                        | TTC30A      | 24.61827          |
| NYEVAQETLTDMPPR                      | TTC30A      | 44.63029          |
| NYEVAQETLTDMPPRAEEELDPVTLHNQALMNMDAR | TTC30A      | 24.72231          |
| QHPELGVGMTTEGFDVR                    | TTC30A      | 27.93952          |
| SLVEQLLSGEGGEESGGDNETDGQVNLGCLLYK    | TTC30A      | 26.22704          |
| YAEAVQLLGR                           | TTC30A      | 28.68934          |
| ACLYAEATR                            | TTC30B      | -25.61216         |
| AGLSGAQIPDGEFTAVVYR                  | TTC30B      | -22.61680         |
| DSVIQECVQFLEHCELHGR                  | TTC30B      | -26.44459         |
| EEEQLSYDDPDKK                        | TTC30B      | -22.61090         |
| EGGEESGGENETDGQINLGCLLYK             | TTC30B      | -26.32410         |
| GNYDFGISR                            | TTC30B      | -25.62171         |
| NIPAVIEQPLEEER                       | TTC30B      | -27.35527         |
| NTVTYESR                             | TTC30B      | -24.41638         |
| QHPELGVGMTTEGIDVR                    | TTC30B      | -23.29323         |
| SLVEQLPSR                            | TTC30B      | -27.06034         |
| YAEAVQLLGELQR                        | TTC30B      | -27.13242         |

### III. IFT-B interactors of TTC30A/B and ratios

| <b>TTC30A interactors</b> | <b>TTC30A_x/y_Control</b> | <b>TTC30B interactors</b> | <b>TTC30A_x/y_Control</b> |
|---------------------------|---------------------------|---------------------------|---------------------------|
| <b>TTC26</b>              | 31,51712                  | <b>TTC26</b>              | 29,65243                  |
| <b>IFT88</b>              | 31,63776                  | <b>IFT88</b>              | 30,08411                  |
| <b>TTC30A (Bait)</b>      | 31,50176                  | <b>TTC30A</b>             | 29,40869                  |
| <b>IFT20</b>              | 29,13248                  | <b>IFT20</b>              | 27,07368                  |
| <b>TTC30B</b>             | 29,87241                  | <b>TTC30B (Bait)</b>      | 29,02791                  |
| <b>TRAF3IP1</b>           | 28,57022                  | <b>TRAF3IP1</b>           | 26,43966                  |
| <b>IFT81</b>              | 8,99273                   | <b>IFT81</b>              | 6,49532                   |
| <b>CLUAP1</b>             | 29,19903                  | <b>CLUAP1</b>             | 27,06651                  |
| <b>IFT74</b>              | 9,26959                   | <b>IFT74</b>              | 7,23361                   |
| <b>IFT27</b>              | 5,88090                   | <b>IFT27</b>              | 3,95420                   |
| <b>IFT22</b>              | 30,72643                  | <b>IFT22</b>              | 28,68761                  |
| <b>IFT46</b>              | 30,86946                  | <b>IFT46</b>              | 28,92667                  |
| <b>IFT57</b>              | 29,75482                  | <b>IFT57</b>              | 27,47053                  |
| <b>IFT80</b>              | 30,11855                  | <b>IFT80</b>              | 27,81675                  |
| <b>IFT172</b>             | 12,52627                  | <b>IFT172</b>             | 10,40726                  |
| <b>IFT52</b>              | 10,05262                  | <b>IFT52</b>              | 8,18796                   |
| <b>HSPB11</b>             | 5,39968                   | <b>HSPB11</b>             | 3,51236                   |
