# Supplementary material for: TTC30A and TTC30B Redundancy Protects IFT Complex B Integrity and Its Pivotal Role in Ciliogenesis
Source: MDPI journal article supplement (doi:10.3390/genes13071191), 2022-07-01
Supplement: s1 [file s1]

Supplementary Figure S6

I. Localization studies of ARL13B and Rootletin in hTERT-RPE1 control and knockout cells

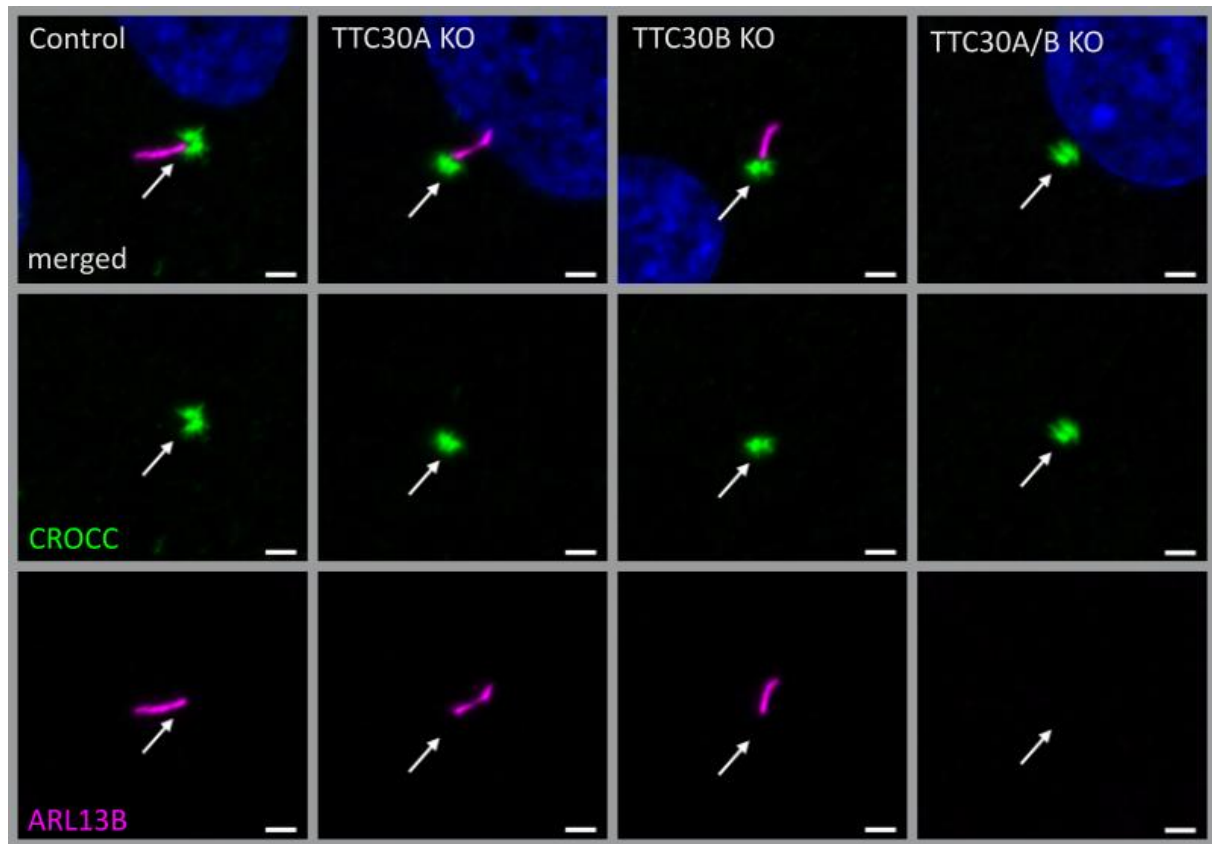

Fluorescent light microscopy pictures of hTERT-RPE1 control, TTC30A knockout, TTC30B knockout and TTC30A/B double knockout (from left to right) are shown. The cells were stained for ARL13B (magenta) and Rootletin (CROCC, green), DNA is marked in dark blue. The scale bar measures 2  $\mu\text{m}$ .
