# Supplementary material for: TTC30A and TTC30B Redundancy Protects IFT Complex B Integrity and Its Pivotal Role in Ciliogenesis
Source: MDPI journal article supplement (doi:10.3390/genes13071191), 2022-07-01
Supplement: s1 [file s1]

## Supplementary Figure S1

### I. Alignment of TTC30A and B nucleotide sequences

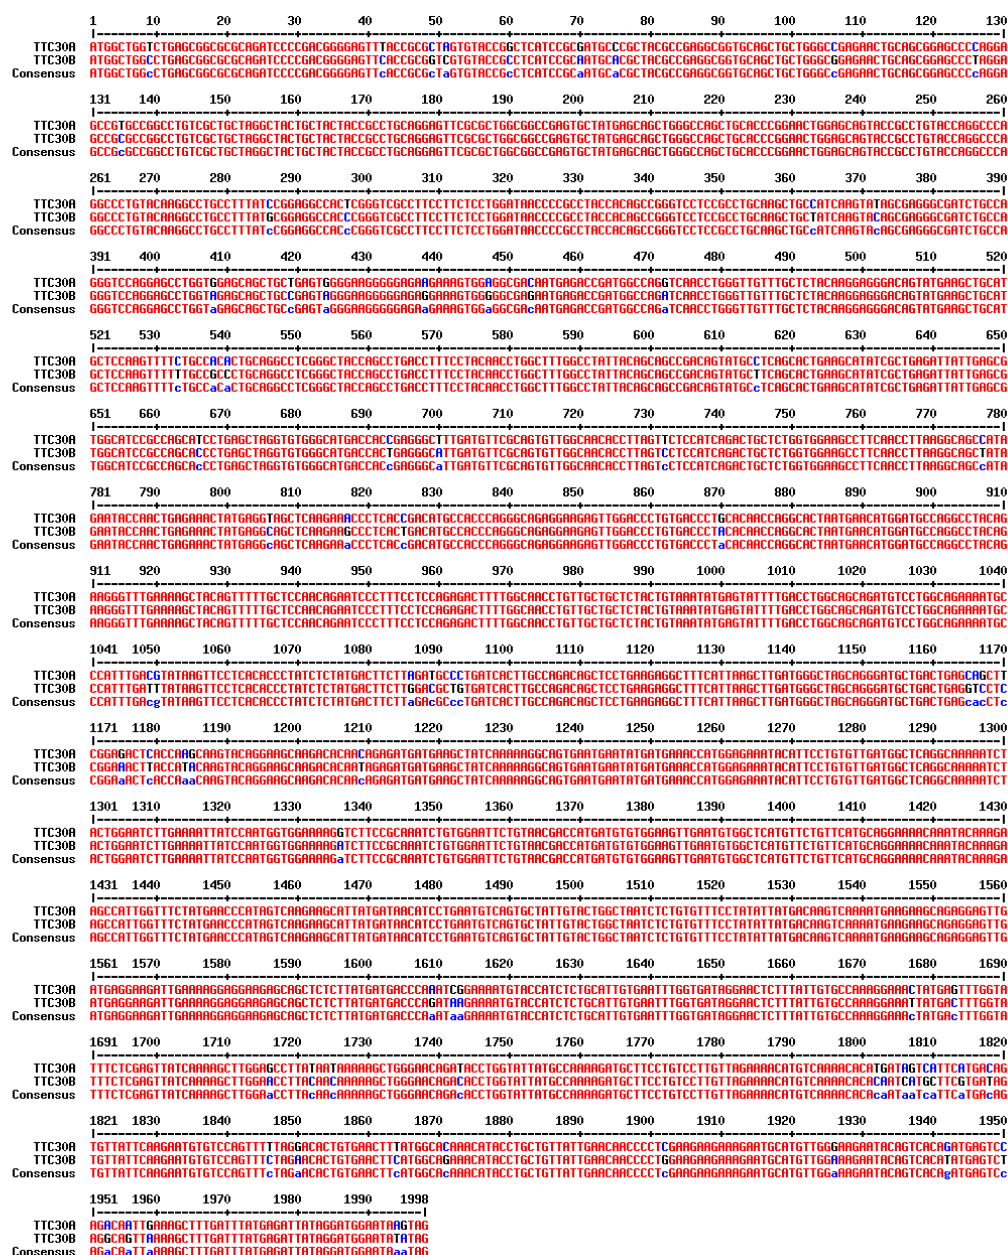

Alignment of TTC30A and TTC30B nucleotide sequences using multiple sequence alignment tool (Corpet, 1988). Different base pairs are depicted in blue, similarities in red.

## II. TTC30A and B sequences showing sites of and premature stop

### Translated sequence

**wt**

```

atg gct ggc ctg agc ggc gcg cag atc ccc gac ggg gag ttc acc gcg gtc gtg tac cgc
M A G L S G A Q I P D G E F T A V V Y R
ctc atc cgc aat gca cgc tac gcc gag gcg gtg cag ctg ctg ggc gga gaa ctg cag cgg
L I R N A R Y A E A V Q L L G G E L Q R
agc cct agg agc cgc gcc ggc ctg tcg ctg cta ggc tac tgc tac tac cgc ctg cag gag
S P R S R A G L S L L G Y C Y Y R L Q E

```

**KO**

```

atg gct ggc ctg agc gca atg cac gct acg ccg agg cgg tgc agc tgc tgg gcg gag aac
M A G L S A M H A T P R R C S C W A E N
tgc agc gga gcc cta gga gcc gcg ccg gcc tgt cgc tgc tag gct act gct act acc gcc
C S G A L G A A P A C R C - A T A T T A
tgc agg agt tcg cgc tgg cgg
C R S S R W R

```

### Translated sequence

**wt**

```

atg gct ggt ctg agc ggc gcg cag atc ccc gac ggg gag ttt acc gcg cta gtg tac cgg
M A G L S G A Q I P D G E F T A L V Y R
ctc atc cgc gat gcc cgc tac gcc gag gcg gtg cag ctg ctg ggc cga gaa ctg cag cgg
L I R D A R Y A E A V Q L L G R E L Q R
agc ccc agg agc cgt gcc ggc ctg tcg ctg cta ggc tac tgc tac tac cgc ctg cag gag
S P R S R A G L S L L G Y C Y Y R L Q E
ttc gcg ctg gcg gcc gag
F A L A A E

```

**KO**

```

atg gct ggt ctg agc ggc gcg cag atc ccc gac gta ccg gct cat ccg cga tgc ccg cta
M A G L S G A Q I P D V P A H P R C P L
cgc cga ggc ggt gca gct gct ggg ccg aga act gca gcg gag ccc cag gag ccg tgc cgg
R R G G A A A G P R T A A E P Q E P C R
cct gtc gct gct agg cta ctg cta cta ccg cct gca gga gtt cgc gct ggc ggc cga gtg
P V A A R L L L L P P A G V R A G G R V
cta tga gca gct ggg cca
L - A A G P

```

The figure depicts parts of nucleotide as well as corresponding amino acid sequence of TTC30A (top) and TTC30B (bottom) wildtype (wt) and knockout (KO) cells. The sequences starting at N-terminus and the red boxes demonstrating first the location of the CRISPR/Cas9 mediated deletion and second the premature stop codon few amino acids later. Translation and depiction was done with Expsy translation tool (Duvaud et al., 2021).

## III. Primer and sgRNA sequences

| sgRNA                   | Nucleotide sequence                                      |
|-------------------------|----------------------------------------------------------|
| <b>TTC30A #1 Top</b>    | TAGCGCGGTAAACTCCCCGT                                     |
| <b>TTC30A #1 Bottom</b> | ACGGGGAGTTTACCGCGCTA                                     |
| <b>TTC30A #2 Top</b>    | AGTTTACCGCGCTAGTGTAC                                     |
| <b>TTC30A #2 Bottom</b> | GTACACTAGCGCGGTAAACT                                     |
| <b>TTC30B #1 Top</b>    | CGGGGATCTGCGCGCCGCTC                                     |
| <b>TTC30B #1 Bottom</b> | GAGCGGCGCGCAGATCCCCG                                     |
| <b>TTC30B #2 Top</b>    | CGTAGCGTGCAATTGCGGATG                                    |
| <b>TTC30B #2 Bottom</b> | CATCCGCAATGCACGCTACG                                     |
| <b>HDR construct</b>    | TTGCTCTGTTGCCATAGTAACCGCACCCATAACAGCCGTGGTGGTTATGGATTATA |

|                         |                                                                     |
|-------------------------|---------------------------------------------------------------------|
|                         | AAGATGATGATGATAAAGCTGGCCTTAGCGGTCGCAGATCCCCGACGGGGAGTT<br>CACCGCGGT |
| <b>Primer</b>           |                                                                     |
| <b>TTC30A forward</b>   | CGTCTTTCCCCTTCTGACTGCC                                              |
| <b>TTC30A reverse</b>   | GCAGATCGCCCTCGCTATACTTG                                             |
| <b>TTC30B forward</b>   | GTAGTCTTTCCCCTCCTGAATG                                              |
| <b>TTC30B reverse</b>   | ATTGCGGATGAGGCGGTACAC                                               |
| <b>Flag tag forward</b> | ATGGATTATAAAGATGATGATGATAAA                                         |

The table shows the nucleotide sequences of the used Primers,sgRNAs and the HDR construct (produced by Integrated DNA Technologies, USA)
