# Supplementary material for: TTC30A and TTC30B Redundancy Protects IFT Complex B Integrity and Its Pivotal Role in Ciliogenesis
Source: Genes (Basel). 2022 Jul 1;13(7):1191. doi: 10.3390/genes13071191 (PMC9319246; doi:10.3390/genes13071191)
Supplement: Supplementary file 1 [file genes-13-01191-s001.zip]

Archive with 8 entries (8 files):
- Supplementary figure S1.pdf
- Supplementary figure S2.pdf
- Supplementary figure S3.pdf
- Supplementary figure S4.pdf
- Supplementary figure S5.pdf
- Supplementary figure S6.pdf
- supplementary table S1.xlsx
- supplementary table S2.xlsx
