# Supplementary material for: TTC30A and TTC30B Redundancy Protects IFT Complex B Integrity and Its Pivotal Role in Ciliogenesis
Source: Genes (Basel). 2022 Jul 1;13(7):1191. doi: 10.3390/genes13071191 (PMC9319246; doi:10.3390/genes13071191)
Supplement: Supplementary file 1 [file genes-13-01191-s001.zip › supplementary table S1.xlsx]

## Sheet: legend
Endogenously Flag tagged HEK283T cells
6 biological replicates each, TTC30A and B and Cas control
filtered for minimum 4 valid values
median
Significance A (Benjamini Hochberg) < 0.05
Permutation based FDR < 0.05
bait
significantly different
IFT-B2

## Sheet: TTC30A
T: Protein IDs	T: Majority protein IDs	T: Protein names	T: Gene names	ratio TTC30A/Cas	median Cas	median TTC30A	C: TTC30A_x/y_Cas A significant	C: Student's T-test Significant TTC30A_Cas	C: Student's T-test significant	N: Peptides	N: Razor + unique peptides	N: Unique peptides	N: Sequence coverage [%]	N: Unique + razor sequence coverage [%]	N: Unique sequence coverage [%]	N: Mol. weight [kDa]	N: Q-value	N: Score	N: Intensity	N: MS/MS count	N: TTC30A_x/y_Cas Significance A	N: -Log Student's T-test p-value TTC30A_Cas	N: Student's T-test q-value TTC30A_Cas	N: Student's T-test Difference TTC30A_Cas	N: Student's T-test Test statistic TTC30A_Cas	T: id
Q13099	Q13099	Intraflagellar transport protein 88 homolog	IFT88	31.635	0	31.635	+	+	TTC30A_Cas	35	35	35	43.4	43.4	43.4	93.19	0	308.44	35.1999	369	0	21.5351	0	31.6275	365.176	1415
A0AVF1	A0AVF1	Intraflagellar transport protein 56	TTC26	31.5065	0	31.5065	+	+	TTC30A_Cas	25	25	25	56.9	56.9	56.9	64.177	0	213.08	34.9666	264	0	3.52566	0.0155714	23.8556	4.92974	3
Q9Y366	Q9Y366	Intraflagellar transport protein 52 homolog	IFT52	31.4341	0	31.4341	+	+	TTC30A_Cas	24	24	24	51	51	51	49.706	0	199.78	34.7914	253	0	3.53234	0.0164615	23.6378	4.94011	2755
Q9NQC8	Q9NQC8	Intraflagellar transport protein 46 homolog	IFT46	30.9373	0	30.9373	+	+	TTC30A_Cas	13	13	13	49.7	49.7	49.7	34.285	0	69.635	34.3282	158	0	3.63103	0.0082	23.5913	5.09455	2456
Q9H7X7	Q9H7X7	Intraflagellar transport protein 22 homolog	IFT22	30.7315	0	30.7315	+	+	TTC30A_Cas	10	10	10	70.8	70.8	70.8	20.835	0	108.69	34.1997	141	0	20.8934	0	30.7309	315.01	2392
Q9P2H3	Q9P2H3	Intraflagellar transport protein 80 homolog	IFT80	30.1511	0	30.1511	+	+	TTC30A_Cas	29	29	29	50.1	50.1	50.1	88.034	0	294.85	33.5865	285	0	3.77494	0.004	23.2679	5.32404	2593
Q86WT1	Q86WT1	Tetratricopeptide repeat protein 30A	TTC30A	30.0139	0	30.0139	+	+	TTC30A_Cas	38	38	16	58.4	58.4	25.9	77.13	0	262.73	33.108	143	0	4.54329	0.000923077	25.9595	6.64787	1860
Q9NWB7	Q9NWB7	Intraflagellar transport protein 57 homolog	IFT57	29.7694	0	29.7694	+	+	TTC30A_Cas	22	22	22	66	66	66	49.108	0	150.24	33.2082	202	0	4.71576	0.000727273	26.0189	6.97095	2519
Q96AJ1	Q96AJ1	Clusterin-associated protein 1	CLUAP1	29.2097	0	29.2097	+	+	TTC30A_Cas	15	15	15	32.7	32.7	32.7	48.125	0	112.08	32.6509	116	0	22.1642	0	29.1998	422.1	2082
Q8IY31	Q8IY31	Intraflagellar transport protein 20 homolog	IFT20	29.1496	0	29.1496	+	+	TTC30A_Cas	7	7	7	69.7	69.7	69.7	15.28	0	68.677	32.6368	123	0	21.949	0	29.1828	401.696	1888
Q8TDR0	Q8TDR0	TRAF3-interacting protein 1	TRAF3IP1	28.6023	0	28.6023	+	+	TTC30A_Cas	17	17	17	24.5	24.5	24.5	78.631	0	32.47	32.0461	98	0	20.6829	0	28.5774	300.107	1981
P04085	P04085	Platelet-derived growth factor subunit A	PDGFA	24.6564	0	24.6564	+	+	TTC30A_Cas	3	3	3	22.3	22.3	22.3	24.043	0	5.4662	28.7712	13	0	18.3898	0	24.6634	176.978	468
Q16775	Q16775	Hydroxyacylglutathione hydrolase, mitochondrial	HAGH	23.8488	0	23.8488	+	+	TTC30A_Cas	4	4	4	19.5	19.5	19.5	33.805	0	4.2707	27.3968	13	0	3.56953	0.0148333	19.9641	4.99804	1648
Q9Y314	Q9Y314	Nitric oxide synthase-interacting protein	NOSIP	23.8266	0	23.8266	+	+	TTC30A_Cas	4	4	4	21.6	21.6	21.6	33.172	0	36.014	28.1715	29	0	2.3539	0.0430968	16.0078	3.24104	2753
Q9UBE0	Q9UBE0	SUMO-activating enzyme subunit 1;SUMO-activating enzyme subunit 1, N-terminally processed	SAE1	23.7492	0	23.7492	+	+	TTC30A_Cas	4	4	4	18.2	18.2	18.2	38.449	0	11.51	27.4689	8	0	2.29544	0.0460759	15.9778	3.16169	2607
Q6UX04	Q6UX04	Peptidyl-prolyl cis-trans isomerase CWC27 homolog	CWC27	23.7397	0	23.7397	+	+	TTC30A_Cas	4	4	4	20.6	20.6	20.6	53.846	0.0012285	2.931	27.7675	7	0	3.60287	0.0118095	19.7682	5.05025	1785
Q9GZL7	Q9GZL7	Ribosome biogenesis protein WDR12	WDR12	23.734	0	23.734	+	+	TTC30A_Cas	4	4	4	15.1	15.1	15.1	47.707	0	7.2799	28.1739	22	0	2.3345	0.0439385	15.9235	3.21469	2334
Q9UKA9	Q9UKA9	Polypyrimidine tract-binding protein 2	PTBP2	23.5797	0	23.5797	+	+	TTC30A_Cas	3	3	3	15.6	15.6	15.6	57.49	0	18.148	27.3023	10	0	3.57036	0.016	19.6563	4.99933	2661
Q8N5L8	Q8N5L8	Ribonuclease P protein subunit p25-like protein	RPP25L	23.5237	0	23.5237	+	+	TTC30A_Cas	2	2	2	19.6	19.6	19.6	17.631	0.0074738	2.1017	27.2301	4	0	3.56978	0.0153043	19.7136	4.99843	1915
Q16763	Q16763	Ubiquitin-conjugating enzyme E2 S	UBE2S	23.3198	0	23.3198	+	+	TTC30A_Cas	4	4	4	29.3	29.3	29.3	23.845	0	13.517	27.747	18	0	3.40676	0.02	19.2978	4.74689	1647
P28161;Q03013;P09488	P28161	Glutathione S-transferase Mu 2	GSTM2	23.3166	0	23.3166	+	+	TTC30A_Cas	3	3	3	21.1	21.1	21.1	25.744	0	4.2404	27.5302	6	0	2.33493	0.044625	15.603	3.21526	761
Q15020	Q15020	Squamous cell carcinoma antigen recognized by T-cells 3	SART3	23.2486	0	23.2486	+	+	TTC30A_Cas	7	7	7	11.6	11.6	11.6	109.93	0	20.132	27.5835	19	0	2.33498	0.0453333	15.6034	3.21534	1559
Q04724;Q04727;Q04725;Q04726	Q04724;Q04727;Q04725;Q04726	Transducin-like enhancer protein 1;Transducin-like enhancer protein 4;Transducin-like enhancer protein 2;Transducin-like enhancer protein 3	TLE1;TLE4;TLE2;TLE3	23.2217	0	23.2217	+	+	TTC30A_Cas	2	2	2	4.2	4.2	4.2	83.2	0	5.462	27.5667	16	0	2.30564	0.0502941	15.5238	3.17553	1346
P22694	P22694	cAMP-dependent protein kinase catalytic subunit beta	PRKACB	23.2206	0	23.2206	+	+	TTC30A_Cas	7	2	2	17.9	8.3	8.3	40.622	0	4.2602	27.3402	8	0	2.38694	0.0406667	15.7242	3.286	701
O15446	O15446	DNA-directed RNA polymerase I subunit RPA34	CD3EAP	23.1364	0	23.1364	+	+	TTC30A_Cas	3	3	3	15.7	15.7	15.7	54.985	0	10.009	27.3799	15	0	2.29557	0.0497534	15.5446	3.16188	218
Q9Y2X3	Q9Y2X3	Nucleolar protein 58	NOP58	23.1291	0	23.1291	+	+	TTC30A_Cas	4	4	4	10.8	10.8	10.8	59.578	0	18.898	27.4622	36	0	2.29949	0.0505143	15.4412	3.16718	2749
Q16555	Q16555	Dihydropyrimidinase-related protein 2	DPYSL2	23.0703	0	23.0703	+	+	TTC30A_Cas	4	4	4	12.8	12.8	12.8	62.293	0	3.9732	26.9864	6	0	2.29555	0.0477895	15.5089	3.16184	1634
P35241	P35241	Radixin	RDX	22.9784	0	22.9784	+	+	TTC30A_Cas	10	3	3	16.1	6.7	6.7	68.563	0	7.7607	27.4992	12	0	3.53123	0.0158519	19.0761	4.9384	837
Q86V21	Q86V21	Acetoacetyl-CoA synthetase	AACS	22.9638	0	22.9638	+	+	TTC30A_Cas	2	2	2	3.7	3.7	3.7	75.143	0.0096844	1.8295	27.1608	8	0	3.5673	0.01456	19.124	4.99455	1851
Q9UKD2	Q9UKD2	mRNA turnover protein 4 homolog	MRTO4	22.9343	0	22.9343	+	+	TTC30A_Cas	2	2	2	10	10	10	27.56	0	5.7944	27.6007	12	0	2.30041	0.0511884	15.3039	3.16844	2662
Q7Z4Q2	Q7Z4Q2	HEAT repeat-containing protein 3	HEATR3	22.7983	0	22.7983	+	+	TTC30A_Cas	2	2	2	4.6	4.6	4.6	74.582	0	12.939	25.8708	8	0	2.29554	0.0472727	15.3478	3.16183	1827
O60942	O60942	mRNA-capping enzyme;Polynucleotide 5-triphosphatase;mRNA guanylyltransferase	RNGTT	22.6877	0	22.6877	+	+	TTC30A_Cas	2	2	2	4.9	4.9	4.9	68.556	0	4.3915	26.7643	14	0	21.2909	0	22.7374	345.209	303
Q0VDF9	Q0VDF9	Heat shock 70 kDa protein 14	HSPA14	22.6013	0	22.6013	+	+	TTC30A_Cas	3	3	3	12.2	12.2	12.2	54.794	0	7.2487	27.1311	17	0	2.29541	0.0455	15.212	3.16166	1380
P49589	P49589	Cysteine--tRNA ligase, cytoplasmic	CARS	22.5134	0	22.5134	+	+	TTC30A_Cas	3	3	3	5.7	5.7	5.7	85.472	0	3.9276	26.7295	4	0	2.29554	0.0466667	15.1563	3.16183	981
Q9UK99	Q9UK99	F-box only protein 3	FBXO3	22.3838	0	22.3838	+	+	TTC30A_Cas	2	2	2	8.3	8.3	8.3	54.56	0	3.922	26.4967	4	0	2.29583	0.0509859	14.9576	3.16222	2659
O14974	O14974	Protein phosphatase 1 regulatory subunit 12A	PPP1R12A	21.6407	0	21.6407	+	+	TTC30A_Cas	3	3	3	3.9	3.9	3.9	115.28	0	9.8724	25.6462	8	0	2.29556	0.0484267	14.5564	3.16185	184
Q8IVD9	Q8IVD9	NudC domain-containing protein 3	NUDCD3	21.6086	0	21.6086	+	+	TTC30A_Cas	2	2	2	7.2	7.2	7.2	40.822	0	4.4138	25.2514	8	0	2.29556	0.0490811	14.5139	3.16186	1871
Q14147	Q14147	Probable ATP-dependent RNA helicase DHX34	DHX34	21.6004	0	21.6004	+	+	TTC30A_Cas	3	3	3	3.9	3.9	3.9	128.12	0.0053578	2.2772	25.277	2	0	2.29571	0.0503889	14.4833	3.16206	1499
Q9UG01	Q9UG01	Intraflagellar transport protein 172 homolog	IFT172	12.5893	19.3056	31.8949	+	+	TTC30A_Cas	88	88	88	61.8	61.8	61.8	197.57	0	323.31	35.3585	842	3.92754e-226	3.08046	0.0197714	20.9513	4.26049	2625
Q96LB3	Q96LB3	Intraflagellar transport protein 74 homolog	IFT74	10.3714	22.0552	32.4266	+	+	TTC30A_Cas	48	48	48	76.7	76.7	76.7	69.239	0	323.31	35.8826	608	6.9597e-154	2.77134	0.0245455	20.4679	3.81775	2153
Q8WYA0	Q8WYA0	Intraflagellar transport protein 81 homolog	IFT81	8.99391	23.7019	32.6958	+	+	TTC30A_Cas	54	54	54	59	59	59	79.745	0	323.31	35.9068	630	4.62686e-116	10.9891	0	8.85292	32.0619	2017
Q6ZQX7	Q6ZQX7	Protein LIAT1	LIAT1	1.9095	25.9608	27.8703	+	+	TTC30A_Cas	12	12	12	60.5	60.5	60.5	49.655	0	60.374	31.8677	118	1.18981e-06	3.92488	0.00266667	2.02605	5.56886	1796
Q5SWX8	Q5SWX8	Protein odr-4 homolog	ODR4	1.83506	30.0084	31.8434	+	+	TTC30A_Cas	27	27	27	56.4	56.4	56.4	51.103	0	323.31	35.7873	505	2.98483e-06	6.96561	0	1.87681	12.3879	1708
Q99417	Q99417	C-Myc-binding protein	MYCBP	1.42267	27.3999	28.8226	+	+	TTC30A_Cas	7	7	7	73.8	73.8	73.8	11.967	0	46.972	32.7356	120	0.000259432	4.84886	0.0008	1.40953	7.22754	2186

## Sheet: TTC30B
T: Protein IDs	T: Majority protein IDs	T: Protein names	T: Gene names	ratio TTC30B/Cas	median Cas	median TTC30B	C: TTC30B_x/y_Cas A significant	C: Student's T-test Significant TTC30B_Cas	C: Student's T-test significant	N: Peptides	N: Razor + unique peptides	N: Unique peptides	N: Sequence coverage [%]	N: Unique + razor sequence coverage [%]	N: Unique sequence coverage [%]	N: Mol. weight [kDa]	N: Q-value	N: Score	N: Intensity	N: MS/MS count	N: TTC30B_x/y_Cas Significance A	N: -Log Student's T-test p-value TTC30B_Cas	N: Student's T-test q-value TTC30B_Cas	N: Student's T-test Difference TTC30B_Cas	N: Student's T-test Test statistic TTC30B_Cas	T: id
Q13099	Q13099	Intraflagellar transport protein 88 homolog	IFT88	30.0695	0	30.0695	+	+	TTC30B_Cas	35	35	35	43.4	43.4	43.4	93.19	0	308.44	35.1999	369	0	20.9373	0	30.1398	318.21	1415
Q9Y366	Q9Y366	Intraflagellar transport protein 52 homolog	IFT52	29.7342	0	29.7342	+	+	TTC30B_Cas	24	24	24	51	51	51	49.706	0	199.78	34.7914	253	0	3.30696	0.00410619	21.9889	4.59581	2755
A0AVF1	A0AVF1	Intraflagellar transport protein 56	TTC26	29.6564	0	29.6564	+	+	TTC30B_Cas	25	25	25	56.9	56.9	56.9	64.177	0	213.08	34.9666	264	0	3.27786	0.00407018	22.029	4.55216	3
Q8N4P2	Q8N4P2	Tetratricopeptide repeat protein 30B	TTC30B	29.2023	0	29.2023	+	+	TTC30B_Cas	38	16	16	64.8	32.2	32.2	77.093	0	165.87	32.2947	78	0	17.3455	0	29.3094	139.141	1911
Q9H7X7	Q9H7X7	Intraflagellar transport protein 22 homolog	IFT22	28.6908	0	28.6908	+	+	TTC30B_Cas	10	10	10	70.8	70.8	70.8	20.835	0	108.69	34.1997	141	0	19.8903	0	28.7871	250.035	2392
Q9NQC8	Q9NQC8	Intraflagellar transport protein 46 homolog	IFT46	28.6749	0	28.6749	+	+	TTC30B_Cas	13	13	13	49.7	49.7	49.7	34.285	0	69.635	34.3282	158	0	3.31955	0.00414286	21.3833	4.61474	2456
Q9P2H3	Q9P2H3	Intraflagellar transport protein 80 homolog	IFT80	27.6005	0	27.6005	+	+	TTC30B_Cas	29	29	29	50.1	50.1	50.1	88.034	0	294.85	33.5865	285	0	3.40761	0.00423301	20.7868	4.74818	2593
Q9NWB7	Q9NWB7	Intraflagellar transport protein 57 homolog	IFT57	27.4885	0	27.4885	+	+	TTC30B_Cas	22	22	22	66	66	66	49.108	0	150.24	33.2082	202	0	4.4104	8.88889e-05	23.9134	6.40587	2519
Q8IY31	Q8IY31	Intraflagellar transport protein 20 homolog	IFT20	27.0987	0	27.0987	+	+	TTC30B_Cas	7	7	7	69.7	69.7	69.7	15.28	0	68.677	32.6368	123	0	20.1176	0	27.1252	263.472	1888
Q96AJ1	Q96AJ1	Clusterin-associated protein 1	CLUAP1	27.0799	0	27.0799	+	+	TTC30B_Cas	15	15	15	32.7	32.7	32.7	48.125	0	112.08	32.6509	116	0	19.2018	0	27.0971	213.376	2082
P12755	P12755	Ski oncogene	SKI	26.6853	0	26.6853	+	+	TTC30B_Cas	12	12	12	26.6	26.6	26.6	80.004	0	33.651	29.666	48	0	21.0427	0	26.7455	326.033	594
Q8TDR0	Q8TDR0	TRAF3-interacting protein 1	TRAF3IP1	26.5059	0	26.5059	+	+	TTC30B_Cas	17	17	17	24.5	24.5	24.5	78.631	0	32.47	32.0461	98	0	19.0703	0	26.5171	207.012	1981
Q5TZA2;Q86T23	Q5TZA2	Rootletin	CROCC	24.1374	0	24.1374	+	+	TTC30B_Cas	3	3	3	1.8	1.8	1.8	228.52	0	6.8375	28.5083	13	0	20.189	0	24.0783	267.84	1723
Q96QR8	Q96QR8	Transcriptional activator protein Pur-beta	PURB	23.7172	0	23.7172	+	+	TTC30B_Cas	2	2	2	17.6	17.6	17.6	33.24	0	7.6536	27.416	11	0	3.56882	0.00295455	19.738	4.99694	2170
Q9Y314	Q9Y314	Nitric oxide synthase-interacting protein	NOSIP	23.7072	0	23.7072	+	+	TTC30B_Cas	4	4	4	21.6	21.6	21.6	33.172	0	36.014	28.1715	29	0	2.32908	0.0118212	15.844	3.20732	2753
Q9UKD2	Q9UKD2	mRNA turnover protein 4 homolog	MRTO4	23.4451	0	23.4451	+	+	TTC30B_Cas	2	2	2	10	10	10	27.56	0	5.7944	27.6007	12	0	2.38035	0.00908046	15.8269	3.27703	2662
O00567	O00567	Nucleolar protein 56	NOP56	23.4074	0	23.4074	+	+	TTC30B_Cas	5	5	5	12.8	12.8	12.8	66.049	0	7.9354	27.612	23	0	3.56417	0.00291304	19.5554	4.98966	154
Q3B7T1	Q3B7T1	Erythroid differentiation-related factor 1	EDRF1	23.3316	0	23.3316	+	+	TTC30B_Cas	5	5	5	6.6	6.6	6.6	138.53	0	7.6235	26.7903	11	0	2.10094	0.025327	15.6424	2.89931	1663
Q14244	Q14244	Ensconsin	MAP7	23.2308	0	23.2308	+	+	TTC30B_Cas	3	3	3	5.2	5.2	5.2	84.051	0.00041964	3.1856	27.0621	5	0	2.09627	0.0252207	15.5741	2.89303	1513
Q99567	Q99567	Nuclear pore complex protein Nup88	NUP88	23.2034	0	23.2034	+	+	TTC30B_Cas	4	4	4	9.9	9.9	9.9	83.541	0	13.597	27.4597	30	0	2.0532	0.0273874	15.5756	2.83518	2197
Q5SSJ5	Q5SSJ5	Heterochromatin protein 1-binding protein 3	HP1BP3	23.1496	0	23.1496	+	+	TTC30B_Cas	3	3	3	7.1	7.1	7.1	61.206	0	5.3488	26.6002	7	0	3.56802	0.00285714	19.2654	4.99568	1706
Q9NUD5	Q9NUD5	Zinc finger CCHC domain-containing protein 3	ZCCHC3	23.1191	0	23.1191	+	+	TTC30B_Cas	2	2	2	12.2	12.2	12.2	43.547	0	3.9526	26.7799	15	0	3.56871	0.00292135	19.2941	4.99676	2498
P35241	P35241	Radixin	RDX	23.116	0	23.116	+	+	TTC30B_Cas	10	3	3	16.1	6.7	6.7	68.563	0	7.7607	27.4992	12	0	2.05183	0.0274619	15.4871	2.83334	837
A3KMH1	A3KMH1	von Willebrand factor A domain-containing protein 8	VWA8	22.9712	0	22.9712	+	+	TTC30B_Cas	4	4	4	2.5	2.5	2.5	214.82	0	4.9391	26.578	13	0	2.14558	0.024078	15.5622	2.95936	7
Q12788	Q12788	Transducin beta-like protein 3	TBL3	22.9699	0	22.9699	+	+	TTC30B_Cas	4	4	4	8	8	8	89.034	0	10.054	27.0207	27	0	2.4418	0.00818713	15.6627	3.36088	1388
Q99547	Q99547	M-phase phosphoprotein 6	MPHOSPH6	22.8081	0	22.8081	+	+	TTC30B_Cas	2	2	2	20	20	20	19.024	0.00042105	3.2359	26.9512	10	0	2.2422	0.0205538	15.0855	3.08966	2195
Q6I9Y2	Q6I9Y2	THO complex subunit 7 homolog	THOC7	22.762	0	22.762	+	+	TTC30B_Cas	5	5	5	32.8	32.8	32.8	23.743	0	37.738	26.4442	18	0	3.57013	0.00298851	19.007	4.99897	1747
Q9UK59	Q9UK59	Lariat debranching enzyme	DBR1	22.7538	0	22.7538	+	+	TTC30B_Cas	2	2	2	4	4	4	61.554	0.0073828	2.024	26.8843	8	0	2.02757	0.0301593	15.1399	2.80077	2656
O60306	O60306	Intron-binding protein aquarius	AQR	22.6695	0	22.6695	+	+	TTC30B_Cas	2	2	2	1.5	1.5	1.5	171.29	0.010018	1.8169	26.8323	2	0	2.09913	0.025283	15.3312	2.89688	275
Q9Y512	Q9Y512	Sorting and assembly machinery component 50 homolog	SAMM50	22.4604	0	22.4604	+	+	TTC30B_Cas	2	2	2	10.4	10.4	10.4	51.976	0	11.997	26.4461	15	0	2.29437	0.0154194	15.1438	3.16024	2793
Q6IAN0	Q6IAN0	Dehydrogenase/reductase SDR family member 7B	DHRS7B	22.4148	0	22.4148	+	+	TTC30B_Cas	2	2	2	8.9	8.9	8.9	35.119	0	5.0714	26.7788	11	0	2.04046	0.0285156	15.0269	2.81807	1749
O60942	O60942	mRNA-capping enzyme;Polynucleotide 5-triphosphatase;mRNA guanylyltransferase	RNGTT	22.1459	0	22.1459	+	+	TTC30B_Cas	2	2	2	4.9	4.9	4.9	68.556	0	4.3915	26.7643	14	0	2.29556	0.0153913	14.8952	3.16186	303
O94813	O94813	Slit homolog 2 protein;Slit homolog 2 protein N-product;Slit homolog 2 protein C-product	SLIT2	22.0677	0	22.0677	+	+	TTC30B_Cas	3	3	3	3.7	3.7	3.7	169.87	0	7.1101	25.7743	8	0	2.06583	0.0265872	14.8074	2.85214	383
P42785	P42785	Lysosomal Pro-X carboxypeptidase	PRCP	20.8308	0	20.8308	+	+	TTC30B_Cas	2	2	2	4.6	4.6	4.6	55.799	0.004662	2.4209	24.8086	1	0	2.29542	0.015373	14.0411	3.16167	916
Q9UG01	Q9UG01	Intraflagellar transport protein 172 homolog	IFT172	10.4416	19.3056	29.7472	+	+	TTC30B_Cas	88	88	88	61.8	61.8	61.8	197.57	0	323.31	35.3585	842	2.22541e-112	2.77176	0.00585714	18.78	3.81833	2625
Q96LB3	Q96LB3	Intraflagellar transport protein 74 homolog	IFT74	8.3191	22.0552	30.3743	+	+	TTC30B_Cas	48	48	48	76.7	76.7	76.7	69.239	0	323.31	35.8826	608	5.04626e-72	2.49237	0.0078303	18.4003	3.43016	2153
Q8WYA0	Q8WYA0	Intraflagellar transport protein 81 homolog	IFT81	6.16748	23.7019	29.8693	+	+	TTC30B_Cas	54	54	54	59	59	59	79.745	0	323.31	35.9068	630	2.04385e-40	9.88966	0	6.07383	24.818	2017
P0DMU9;Q5DJT8;P0DMV2;P0DMV1;Q8NHU0;Q5HYN5;P0DMV0;P0DMU8;P0DMU7	P0DMU9;Q5DJT8;P0DMV2;P0DMV1	Cancer/testis antigen family 45 member A10;Cancer/testis antigen family 45 member A2;Cancer/testis antigen family 45 member A9;Cancer/testis antigen family 45 member A8	CT45A10;CT45A2;CT45A9;CT45A8	3.80317	21.5545	25.3576	+	+	TTC30B_Cas	5	5	5	32.3	32.3	32.3	21.145	0	53.913	28.4234	27	1.87472e-16	1.94833	0.0337983	13.8527	2.69445	556
A6NHR9	A6NHR9	Structural maintenance of chromosomes flexible hinge domain-containing protein 1	SMCHD1	2.6976	21.4925	24.1901	+	+	TTC30B_Cas	6	6	6	5	5	5	226.37	0	34.833	28.0408	29	4.29584e-09	1.77305	0.0398788	12.6841	2.45913	14
Q8IWS0	Q8IWS0	PHD finger protein 6	PHF6	2.23355	20.7466	22.9801	+	+	TTC30B_Cas	8	8	8	31	31	31	41.29	0	26.102	26.9519	32	1.00077e-06	1.75668	0.040342	11.9477	2.43709	1880
Q9BYN8	Q9BYN8	28S ribosomal protein S26, mitochondrial	MRPS26	1.80172	22.3619	24.1636	+	+	TTC30B_Cas	3	3	3	16.6	16.6	16.6	24.211	0	6.5441	28.1727	18	6.67873e-05	1.68863	0.0439007	12.3886	2.34535	2317
Q13523	Q13523	Serine/threonine-protein kinase PRP4 homolog	PRPF4B	1.77292	23.0527	24.8256	+	+	TTC30B_Cas	6	6	6	7.1	7.1	7.1	116.99	0	9.0297	28.8113	37	8.58071e-05	1.69168	0.0439571	12.6839	2.34947	1458
P62805	P62805	Histone H4	HIST1H4A	1.7095	25.9929	27.7024	+	+	TTC30B_Cas	6	6	6	40.8	40.8	40.8	11.367	0	17.353	31.4598	85	0.000147072	5.07815	0	1.67423	7.68524	1211
Q8N5Z5	Q8N5Z5	BTB/POZ domain-containing protein KCTD17	KCTD17	1.60668	26.9267	28.5334	+	+	TTC30B_Cas	12	12	12	69.2	69.2	69.2	35.67	0	119.76	32.2679	189	0.000339221	6.59182	0	1.73135	11.3026	1918
Q5HYJ3	Q5HYJ3	Protein FAM76B	FAM76B	1.46064	25.5141	26.9748	+	+	TTC30B_Cas	14	14	13	40.4	40.4	36.9	38.708	0	62.086	30.789	71	0.00102658	5.20746	0	1.4501	7.95255	1694
P31751;Q9Y243;P31749	P31751	RAC-beta serine/threonine-protein kinase	AKT2	1.43286	21.3108	22.7437	+	+	TTC30B_Cas	4	4	4	11.6	11.6	11.6	55.768	0	3.4828	26.9544	18	0.00125396	1.64658	0.0492587	11.483	2.2885	804
P62318	P62318	Small nuclear ribonucleoprotein Sm D3	SNRPD3	1.32012	30.8651	32.1852	+	+	TTC30B_Cas	6	6	6	54	54	54	13.916	0	72.699	36.2251	278	0.00272908	5.58813	0	1.36072	8.78065	1199

## Sheet: TTC30 unique peptides
T: Proteins	T: Leading razor protein	T: Gene names	T: Protein names	ratio TTC30A/TTC30B	ratio TTC30A/Cas	ratio TTC30B/Cas	median TTC30A	median TTC30B	median Cas	C: Protein group IDs	C: Student's T-test Significant Cas_TTC30A	C: Student's T-test Significant Cas_TTC30B	C: Student's T-test significant_	C: TTC30A_x/y_Cas A significant	C: TTC30B_x/y_Cas A significant	C: TTC30A_x/y_TTC30B A significant	C: Student's T-test Significant TTC30A_TTC30B	C: Student's T-test significant	N: R Count	N: K Count	N: Length	N: Mass	N: PEP	N: Score	N: Intensity	N: MS/MS Count	N: -Log Student's T-test p-value TTC30A_TTC30B	N: Student's T-test q-value TTC30A_TTC30B	N: Student's T-test Difference TTC30A_TTC30B	N: Student's T-test Test statistic TTC30A_TTC30B	N: -Log Student's T-test p-value Cas_TTC30A	N: Student's T-test q-value Cas_TTC30A	N: Student's T-test Difference Cas_TTC30A	N: Student's T-test Test statistic Cas_TTC30A	N: -Log Student's T-test p-value Cas_TTC30B	N: Student's T-test q-value Cas_TTC30B	N: Student's T-test Difference Cas_TTC30B	N: Student's T-test Test statistic Cas_TTC30B	N: TTC30A_x/y_TTC30B Significance A	N: TTC30A_x/y_Cas Significance A	N: TTC30B_x/y_Cas Significance A	T: Sequence	T: id	T: Gene names_
Q86WT1	Q86WT1	TTC30A	Tetratricopeptide repeat protein 30A	24.7737	24.7737	0	24.7737	0	0	1860	+		Cas_TTC30A	+		+	+	TTC30A_TTC30B	1	0	19	1964	2.279e-05	153.81	28.2364	8	16.4713	0.00237975	24.9554	121.928	16.7723	0.000578512	-24.9554	-121.928	NaN	1	0	NaN	1.58422e-112	1.00256e-183	0.529167	AGLSGAQIPDGEFTALVYR	774	TTC30A
Q86WT1	Q86WT1	TTC30A	Tetratricopeptide repeat protein 30A	25.7348	25.7348	0	25.7348	0	0	1860	+		Cas_TTC30A	+		+	+	TTC30A_TTC30B	0	1	11	1318.73	5.351e-05	166.3	29.0317	13	19.6137	0.00105263	25.7917	251.447	19.9147	0.000358974	-25.7917	-251.447	NaN	1	0	NaN	2.66895e-121	3.89766e-198	0.529167	ALIYEIIGWNK	1202	TTC30A
Q86WT1	Q86WT1	TTC30A	Tetratricopeptide repeat protein 30A	25.4035	25.4035	0	25.4035	0	0	1860	+		Cas_TTC30A	+		+	+	TTC30A_TTC30B	1	1	24	2552.2	3.3423e-09	124.31	28.4944	5	3.26884	0.00592832	21.2141	4.99858	3.56987	0.0121567	-21.2141	-4.99858	NaN	1	0	NaN	3.07894e-118	4.17219e-193	0.529167	DDDDKAGLSGAQIPDGEFTALVYR	2579	TTC30A
Q86WT1	Q86WT1	TTC30A	Tetratricopeptide repeat protein 30A	22.8843	22.8843	0	22.8843	0	0	1860	+		Cas_TTC30A	+		+	+	TTC30A_TTC30B	1	0	12	1493.63	1.1899e-05	180.67	26.1378	7	17.8157	0.00277551	22.9306	166.192	18.1167	0.0005	-22.9306	-166.192	NaN	1	0	NaN	2.98762e-96	5.35736e-157	0.529167	EEEQLSYDDPNR	4083	TTC30A
Q86WT1	Q86WT1	TTC30A	Tetratricopeptide repeat protein 30A	25.699	25.699	0	25.699	0	0	1860	+		Cas_TTC30A	+		+	+	TTC30A_TTC30B	1	1	13	1621.72	7.0933e-11	218.07	28.9072	13	17.7932	0.00272	25.722	165.332	18.0942	0.000491979	-25.722	-165.332	NaN	1	0	NaN	5.7426e-121	1.37213e-197	0.529167	EEEQLSYDDPNRK	4084	TTC30A
Q86WT1	Q86WT1	TTC30A	Tetratricopeptide repeat protein 30A	27.3548	27.3548	0	27.3548	0	0	1860	+		Cas_TTC30A	+		+	+	TTC30A_TTC30B	1	0	9	1041.49	0.00042455	167.23	30.4567	6	19.5349	0.001	27.2819	246.925	19.8359	0.000345679	-27.2819	-246.925	NaN	1	0	NaN	7.63589e-137	1.14157e-223	0.529167	GNYEFGISR	7326	TTC30A
Q86WT1	Q86WT1	TTC30A	Tetratricopeptide repeat protein 30A	21.9395	21.9395	0	21.9395	0	0	1860	+		Cas_TTC30A	+		+	+	TTC30A_TTC30B	1	1	15	1863.85	0.0018923	132.97	25.137	3	15.8935	0.00225287	21.8999	106.729	16.1945	0.000703125	-21.8999	-106.729	NaN	1	0	NaN	1.3506e-88	1.98608e-144	0.529167	IEKEEEQLSYDDPNR	8741	TTC30A
Q86WT1	Q86WT1	TTC30A	Tetratricopeptide repeat protein 30A	22.9133	22.9133	0	22.9133	0	0	1860	+		Cas_TTC30A	+		+	+	TTC30A_TTC30B	1	2	16	1991.94	0.00087849	143.43	26.1875	7	16.3531	0.00232099	23.0139	118.654	16.6542	0.000647773	-23.0139	-118.654	NaN	1	0	NaN	1.72042e-96	2.16458e-157	0.529167	IEKEEEQLSYDDPNRK	8742	TTC30A
Q86WT1	Q86WT1	TTC30A	Tetratricopeptide repeat protein 30A	25.0743	25.0743	0	25.0743	0	0	1860	+		Cas_TTC30A	+		+	+	TTC30A_TTC30B	1	2	16	1991.94	7.8818e-73	258.09	28.4972	14	16.8709	0.0026087	25.3272	133.687	17.1719	0.000599119	-25.3272	-133.687	NaN	1	0	NaN	3.10492e-115	3.57938e-188	0.529167	KIEKEEEQLSYDDPNR	10411	TTC30A
Q86WT1	Q86WT1	TTC30A	Tetratricopeptide repeat protein 30A	23.901	23.901	0	23.901	0	0	1860	+		Cas_TTC30A	+		+	+	TTC30A_TTC30B	1	0	13	1415.74	1.5128e-05	150.69	27.4379	4	15.4797	0.00235556	24.1005	97.0208	15.7807	0.000728625	-24.1005	-97.0208	NaN	1	0	NaN	7.5414e-105	4.07574e-171	0.529167	LDGLAGMLTEQLR	11245	TTC30A
Q86WT1	Q86WT1	TTC30A	Tetratricopeptide repeat protein 30A	25.5609	25.5609	0	25.5609	0	0	1860	+		Cas_TTC30A	+		+	+	TTC30A_TTC30B	1	2	28	3089.43	1.2271e-17	137.11	28.7189	7	20.5151	0.0004	25.4985	309.458	20.8162	0.000114286	-25.4985	-309.458	NaN	1	0	NaN	1.09278e-119	1.73348e-195	0.529167	MDYKDDDDKAGLSGAQIPDGEFTALVYR	13588	TTC30A
Q86WT1	Q86WT1	TTC30A	Tetratricopeptide repeat protein 30A	24.2999	24.2999	0	24.2999	0	0	1860	+		Cas_TTC30A	+		+	+	TTC30A_TTC30B	1	0	15	1762.82	3.788e-12	148.18	27.1396	21	13.2688	0.00308	23.8218	58.2644	13.5698	0.000877076	-23.8218	-58.2644	NaN	1	0	NaN	2.52787e-108	8.01352e-177	0.529167	NYEVAQETLTDMPPR	14974	TTC30A
Q86WT1	Q86WT1	TTC30A	Tetratricopeptide repeat protein 30A	24.1063	24.1063	0	24.1063	0	0	1860	+		Cas_TTC30A	+		+	+	TTC30A_TTC30B	2	0	36	4140.92	3.7391e-14	90.799	27.3264	10	17.7899	0.00266667	24.1246	165.207	18.091	0.000489362	-24.1246	-165.207	NaN	1	0	NaN	1.24872e-106	4.84601e-174	0.529167	NYEVAQETLTDMPPRAEEELDPVTLHNQALMNMDAR	14975	TTC30A
Q86WT1	Q86WT1	TTC30A	Tetratricopeptide repeat protein 30A	27.2899	27.2899	0	27.2899	0	0	1860	+		Cas_TTC30A	+		+	+	TTC30A_TTC30B	1	0	17	1871.88	0.00058349	115.78	30.4902	13	4.35241	0.000962406	23.8318	6.85301	4.45503	0.00119008	-23.6615	-6.48649	0.28975	0.876544	0.170341	0.0338191	3.33729e-136	1.28761e-222	0.529167	QHPELGVGMTTEGFDVR	15480	TTC30A
Q86WT1	Q86WT1	TTC30A	Tetratricopeptide repeat protein 30A	28.0689	28.0689	0	28.0689	0	0	1860	+		Cas_TTC30A	+		+	+	TTC30A_TTC30B	1	0	10	1118.61	0.00025973	169.06	31.2212	7	4.51784	0.000899598	24.6112	7.16915	4.82464	0.00109524	-24.6159	-7.18036	0.301358	0.830833	-0.00470702	-0.000970557	5.36269e-144	2.01943e-235	0.529167	YAEAVQLLGR	21693	TTC30A
Q8N4P2	Q8N4P2	TTC30B	Tetratricopeptide repeat protein 30B	-24.992	0	24.992	0	24.992	0	1911		+	Cas_TTC30B		+	+	+	TTC30A_TTC30B	1	0	9	1053.49	0.031534	76.478	27.6447	2	1.99446	0.02463	-16.8172	-3.16177	NaN	1	0	NaN	2.29549	0.0404601	-16.8172	-3.16177	5.48041e-246	0.552604	4.31172e-219	ACLYAEATR	298	TTC30B
Q8N4P2	Q8N4P2	TTC30B	Tetratricopeptide repeat protein 30B	-22.4544	0	22.4544	0	22.4544	0	1911		+	Cas_TTC30B		+	+	+	TTC30A_TTC30B	1	0	19	1949.98	0.00041587	98.337	25.6014	6	3.30041	0.00476981	-18.6776	-5.048	0.768412	0.516148	-3.68601	-1	14.3383	0.00236098	-22.3636	-69.5705	4.0395e-199	0.552604	3.15997e-177	AGLSGAQIPDGEFTAVVYR	775	TTC30B
Q8N4P2	Q8N4P2	TTC30B	Tetratricopeptide repeat protein 30B	-23.8622	0	23.8622	0	23.8622	0	1911		+	Cas_TTC30B		+	+	+	TTC30A_TTC30B	1	1	24	2538.19	0.015431	54.261	26.7266	2	18.469	0.0032	-23.8077	-193.176	NaN	1	0	NaN	18.77	0.00109091	-23.8077	-193.176	1.66657e-224	0.552604	6.72548e-200	DDDDKAGLSGAQIPDGEFTAVVYR	2580	TTC30B
Q8N4P2	Q8N4P2	TTC30B	Tetratricopeptide repeat protein 30B	-25.9928	0	25.9928	0	25.9928	0	1911		+	Cas_TTC30B		+	+	+	TTC30A_TTC30B	1	0	19	2355.07	7.8112e-05	136.34	29.0315	8	17.1232	0.00260317	-26.0834	-141.688	NaN	1	0	NaN	17.4243	0.00129231	-26.0834	-141.688	7.63599e-266	0.552604	7.78361e-237	DSVIQECVQFLEHCELHGR	3480	TTC30B
Q8N4P2	Q8N4P2	TTC30B	Tetratricopeptide repeat protein 30B	-22.2657	0	22.2657	0	22.2657	0	1911		+	Cas_TTC30B		+	+	+	TTC30A_TTC30B	0	2	13	1594.7	5.4752e-113	289.96	25.3213	7	15.9594	0.00227907	-22.3982	-108.364	NaN	1	0	NaN	16.2605	0.00174713	-22.3982	-108.364	7.79783e-196	0.552604	2.71414e-174	EEEQLSYDDPDKK	4082	TTC30B
Q8N4P2	Q8N4P2	TTC30B	Tetratricopeptide repeat protein 30B	-26.0617	0	26.0617	0	26.0617	0	1911		+	Cas_TTC30B		+	+	+	TTC30A_TTC30B	0	1	24	2568.13	3.9518e-18	133.47	28.9368	8	20.9425	0	-26.0586	-341.459	NaN	1	0	NaN	21.2435	0.0005	-26.0586	-341.459	3.08515e-267	0.552604	4.42305e-238	EGGEESGGENETDGQINLGCLLYK	4268	TTC30B
Q8N4P2	Q8N4P2	TTC30B	Tetratricopeptide repeat protein 30B	-25.4283	0	25.4283	0	25.4283	0	1911		+	Cas_TTC30B		+	+	+	TTC30A_TTC30B	1	0	9	1027.47	0.038452	74.301	28.2913	1	18.2088	0.00273171	-25.4034	-181.939	NaN	1	0	NaN	18.5098	0.00117949	-25.4034	-181.939	1.50684e-254	0.552604	9.66344e-227	GNYDFGISR	7325	TTC30B
Q8N4P2	Q8N4P2	TTC30B	Tetratricopeptide repeat protein 30B	-25.9864	0	25.9864	0	25.9864	0	1911		+	Cas_TTC30B		+	+	+	TTC30A_TTC30B	1	2	28	3075.41	1.6544e-12	114.2	28.8429	10	16.8188	0.00259155	-25.9203	-132.09	NaN	1	0	NaN	17.1198	0.0014069	-25.9203	-132.09	1.03226e-265	0.552604	1.01903e-236	MDYKDDDDKAGLSGAQIPDGEFTAVVYR	13589	TTC30B
Q8N4P2	Q8N4P2	TTC30B	Tetratricopeptide repeat protein 30B	-27.1695	0	27.1695	0	27.1695	0	1911		+	Cas_TTC30B		+	+	+	TTC30A_TTC30B	1	0	14	1635.85	6.7645e-05	147.28	29.9775	7	20.0959	0.00125	-27.08	-280.982	NaN	1	0	NaN	20.397	0.000533333	-27.08	-280.982	3.52285e-290	0.552604	1.37934e-258	NIPAVIEQPLEEER	14329	TTC30B
Q8N4P2	Q8N4P2	TTC30B	Tetratricopeptide repeat protein 30B	-23.9083	0	23.9083	0	23.9083	0	1911		+	Cas_TTC30B		+	+	+	TTC30A_TTC30B	1	0	8	968.456	0.0080551	124.08	26.7457	3	3.26766	0.00615679	-20.0549	-4.99672	NaN	1	0	NaN	3.56869	0.0116261	-20.0549	-4.99672	2.31642e-225	0.552604	1.15388e-200	NTVTYESR	14846	TTC30B
Q8N4P2	Q8N4P2	TTC30B	Tetratricopeptide repeat protein 30B	-23.0596	0	23.0596	0	23.0596	0	1911		+	Cas_TTC30B		+	+	+	TTC30A_TTC30B	1	0	17	1837.9	0.00087634	97.69	25.8454	4	14.3969	0.00301031	-22.8672	-75.5874	NaN	1	0	NaN	14.6979	0.00229703	-22.8672	-75.5874	7.62225e-210	0.552604	8.36327e-187	QHPELGVGMTTEGIDVR	15481	TTC30B
Q8N4P2	Q8N4P2	TTC30B	Tetratricopeptide repeat protein 30B	-26.7787	0	26.7787	0	26.7787	0	1911		+	Cas_TTC30B		+	+	+	TTC30A_TTC30B	1	0	9	1027.57	0.0022209	127.02	29.6788	5	4.33043	0.000968577	-23.3612	-6.81174	0.768412	0.516255	-3.42706	-1	19.0299	0.000866667	-26.7882	-205.094	5.61469e-282	0.552604	2.96173e-251	SLVEQLPSR	17392	TTC30B
Q8N4P2	Q8N4P2	TTC30B	Tetratricopeptide repeat protein 30B	-26.751	0	26.751	0	26.751	0	1911		+	Cas_TTC30B		+	+	+	TTC30A_TTC30B	1	0	14	1545.82	3.5861e-09	196.27	29.6902	11	18.3473	0.00294737	-26.7931	-187.838	NaN	1	0	NaN	18.6483	0.00105556	-26.7931	-187.838	2.11034e-281	0.552604	9.67212e-251	YAEAVQLLGGELQR	21692	TTC30B
