# Supplementary material for: TTC30A and TTC30B Redundancy Protects IFT Complex B Integrity and Its Pivotal Role in Ciliogenesis
Source: Genes (Basel). 2022 Jul 1;13(7):1191. doi: 10.3390/genes13071191 (PMC9319246; doi:10.3390/genes13071191)
Supplement: Supplementary file 1 [file genes-13-01191-s001.zip › supplementary table S2.xlsx]

## Sheet: legend
TTC30A KO, TTC30B KO, TTC30A+B KO, Cas empry control HEK283T cells
4 biological replicates each
filtered for minimum 3 valid values
median
Significance B (Benjamini Hochberg) < 0.05
Students t-test p < 0.05
bait
significantly changed
IFT-B1

## Sheet: IFT88
T: Protein IDs	T: Majority protein IDs	T: Protein names	T: Gene names	AB_IFT88_x/y_Cas_IFT88	B_IFT88_x/y_Cas_IFT88	AB_IFT88_x/y_AB_RAF1	B_IFT88_x/y_B_RAF1	Cas_IFT88_x/y_Cas_RAF1	AB_RAF1	B_RAF1	Cas_RAF1	AB_IFT88	B_IFT88	Cas_IFT88	C: AB_IFT88_x/y_AB_RAF1 B significant	C: B_IFT88_x/y_B_RAF1 B significant	C: Cas_IFT88_x/y_Cas_RAF1 B significant	C: Student's T-test Significant AB_RAF1_AB_IFT88	C: Student's T-test Significant B_RAF1_B_IFT88	C: Student's T-test Significant Cas_RAF1_Cas_IFT88	C: AB_IFT88_x/y_Cas_IFT88 B significant	C: B_IFT88_x/y_Cas_IFT88 B significant	C: Student's T-test Significant AB_IFT88_Cas_IFT88	C: Student's T-test Significant B_IFT88_Cas_IFT88	N: Peptides	N: Razor + unique peptides	N: Unique peptides	N: Sequence coverage [%]	N: Unique + razor sequence coverage [%]	N: Unique sequence coverage [%]	N: Mol. weight [kDa]	N: Q-value	N: Score	N: Intensity	N: MS/MS count	N: AB_IFT88_x/y_AB_RAF1 Significance B	N: B_IFT88_x/y_B_RAF1 Significance B	N: Cas_IFT88_x/y_Cas_RAF1 Significance B	N: -Log Student's T-test p-value AB_RAF1_AB_IFT88	N: Student's T-test Difference AB_RAF1_AB_IFT88	N: Student's T-test Test statistic AB_RAF1_AB_IFT88	N: -Log Student's T-test p-value B_RAF1_B_IFT88	N: Student's T-test Difference B_RAF1_B_IFT88	N: Student's T-test Test statistic B_RAF1_B_IFT88	N: -Log Student's T-test p-value Cas_RAF1_Cas_IFT88	N: Student's T-test Difference Cas_RAF1_Cas_IFT88	N: Student's T-test Test statistic Cas_RAF1_Cas_IFT88	N: AB_IFT88_x/y_Cas_IFT88 Significance B	N: B_IFT88_x/y_Cas_IFT88 Significance B
Q8N4P2	Q8N4P2	Tetratricopeptide repeat protein 30B	TTC30B	-26.7672	-26.7672	0	0	26.7672	0	0	0	0	0	26.7672			+			+	+	+	+	+	28	9	9	54.7	20.8	20.8	76.098	0	323.31	31.9553	70	0.653092	0.635516	0	0.74968	-5.77819	-1	NaN	0	NaN	14.2496	-26.7396	-426.221	0	0
Q86WT1	Q86WT1	Tetratricopeptide repeat protein 30A	TTC30A	-7.46955	-0.6735	21.6444	28.4404	6.75603	0	0	22.3579	21.6444	28.4404	29.1139	+	+	+	+	+	+	+	+	+		31	31	12	52	52	21.2	76.135	0	323.31	35.1863	376	0	0	5.04014e-266	7.74193	-21.8053	-35.0031	2.35146	-22.378	-3.80613	5.23754	-6.82401	-13.2196	2.5433e-206	0.0013119
Q96LB3	Q96LB3	Intraflagellar transport protein 74 homolog	IFT74	-1.48855	-0.804931	4.64841	5.36747	5.88068	24.043	24.0076	24.2993	28.6914	29.375	30.18	+	+	+	+	+	+	+	+	+	+	51	51	51	77.7	77.7	77.7	69.239	0	323.31	36.4365	1126	2.33726e-90	1.73922e-50	7.7607e-202	6.3669	-4.80031	-20.5677	6.69754	-5.21448	-23.3827	5.75422	-5.90262	-16.1976	9.64319e-10	8.9782e-05
Q8WYA0	Q8WYA0	Intraflagellar transport protein 81 homolog	IFT81	-1.33916	-0.665811	8.13109	6.41664	7.53757	20.6438	23.0316	22.5765	28.7749	29.4482	30.114	+	+	+	+	+	+	+	+	+	+	54	54	54	59	59	59	79.745	0	323.31	36.4323	1029	8.81729e-277	2.98876e-71	0	5.3343	-7.96469	-13.7344	4.851	-6.5071	-11.3381	6.20045	-7.38596	-19.2787	3.74683e-08	0.00151279
Q9H7X7	Q9H7X7	Intraflagellar transport protein 22 homolog	IFT22	-1.29211	-0.814835	27.553	4.85905	5.95409	0	23.1713	22.8911	27.553	28.0303	28.8451	+	+	+	+		+	+	+	+	+	11	11	11	75.7	75.7	75.7	20.835	0	323.31	35.0988	325	0	9.60989e-42	7.07095e-207	2.15992	-21.3025	-3.43775	1.21374	-10.5015	-1.79817	1.32957	-11.5199	-1.99059	1.10007e-07	7.19749e-05
Q9Y366	Q9Y366	Intraflagellar transport protein 52 homolog	IFT52	-1.22384	-0.596092	27.5756	28.2033	8.33696	0	0	20.4624	27.5756	28.2033	28.7994	+	+	+	+	+	+	+		+	+	23	23	23	50.6	50.6	50.6	49.706	0	313.53	35.1525	427	0	0	0	2.47039	-22.1292	-4.04416	2.46326	-22.5709	-4.02968	1.83264	-17.9209	-2.84425	4.92346e-07	0.0051238
Q9NQC8	Q9NQC8	Intraflagellar transport protein 46 homolog	IFT46	-1.1944	-0.587099	5.87809	6.19264	5.45154	21.5585	21.8512	23.1794	27.4365	28.0439	28.631	+	+	+	+	+	+	+		+	+	12	12	12	53.9	53.9	53.9	34.285	0	145.02	34.8438	333	2.00076e-144	1.64907e-66	1.25412e-173	6.00013	-6.04156	-17.8312	1.38613	-11.4951	-2.08464	3.78955	-6.05275	-7.34961	9.17591e-07	0.00594096
A0AVF1	A0AVF1	Intraflagellar transport protein 56	TTC26	-1.08556	-0.586381	3.86945	4.41324	4.8921	23.989	23.9444	24.0519	27.8584	28.3576	28.944	+	+	+	+			+		+	+	25	25	25	52.5	52.5	52.5	64.177	0	241.7	35.2951	499	9.6613e-63	8.7118e-35	4.48098e-140	4.17543	-3.64952	-8.62724	1.15682	-10.2725	-1.70341	1.19579	-10.7235	-1.76832	8.11953e-06	0.00601098
Q9BW83	Q9BW83	Intraflagellar transport protein 27 homolog	IFT27	-0.982764	-0.666288	2.36182	2.80978	3.4014	25.3231	25.1916	25.2663	27.6849	28.0014	28.6677	+	+	+	+	+	+	+	+	+	+	11	11	11	68.8	68.8	68.8	20.48	0	54.972	34.9792	234	7.05744e-24	3.21719e-15	1.89278e-68	5.26849	-2.32048	-13.3823	6.57402	-2.94121	-22.2895	9.17206	-3.42195	-60.6847	5.3379e-05	0.00149955
Q9Y547	Q9Y547	Intraflagellar transport protein 25 homolog	HSPB11	-0.944757	-0.612259	2.42524	2.7956	3.13284	24.0029	23.965	24.24	26.4281	26.7606	27.3729	+	+	+	+	+		+	+	+	+	4	4	4	36.1	36.1	36.1	16.297	0	106.47	33.6091	141	3.98629e-25	4.3909e-15	2.71929e-58	3.50162	-2.80414	-6.50216	6.78282	-2.75316	-24.1679	1.02514	-9.04195	-1.4824	0.000102583	0.00390595
Q13099	Q13099	Intraflagellar transport protein 88 homolog	IFT88	-0.395313	-0.460691	14.2463	34.1124	11.0272	19.9315	0	23.546	34.1778	34.1124	34.5731	+	+	+	+	+	+					59	59	59	54.6	54.6	54.6	93.19	0	323.31	38.7246	1669	0	0	0	2.34831	-23.4702	-3.79993	3.32168	-29.306	-6.01308	1.81327	-16.7135	-2.81031	0.103017	0.0380234
Q96AJ1	Q96AJ1	Clusterin-associated protein 1	CLUAP1	0.340435	-0.210212	26.2165	25.6659	7.54407	0	0	18.332	26.2165	25.6659	25.8761	+	+	+	+	+	+			+		26	26	26	55.4	55.4	55.4	48.125	0	323.31	35.921	403	0	0	0	2.48014	-21.0564	-4.06401	13.1889	-25.6922	-283.688	1.79306	-15.8979	-2.77502	0.103234	0.462789
Q9UG01	Q9UG01	Intraflagellar transport protein 172 homolog	IFT172	0.406612	-0.100243	4.50378	4.41097	4.29988	24.8246	24.4106	24.6219	29.3284	28.8215	28.9218	+	+	+	+	+	+			+		117	117	117	73.2	73.2	73.2	197.57	0	323.31	38.5735	2400	7.67039e-85	9.416e-35	1.59052e-108	4.79642	-4.7784	-11.0934	7.30224	-4.29094	-29.5427	5.32482	-4.26126	-13.6831	0.0514042	0.884077
Q9NWB7	Q9NWB7	Intraflagellar transport protein 57 homolog	IFT57	0.461103	-0.243122	5.11132	4.87564	5.69787	21.6258	21.1573	20.5781	26.7371	26.0329	26.276	+	+	+	+		+					25	25	25	66	66	66	49.108	0	323.31	36.23	604	3.31606e-109	5.14108e-42	1.47468e-189	5.71488	-5.08877	-15.95	1.26891	-10.1551	-1.88984	1.33915	-10.5422	-2.0065	0.0270686	0.362629
Q8IY31	Q8IY31	Intraflagellar transport protein 20 homolog	IFT20	0.561138	-0.0980631	26.2205	25.5613	25.6594	0	0	0	26.2205	25.5613	25.6594	+	+	+	+	+	+					13	13	13	73.5	73.5	73.5	15.28	0	323.31	35.4604	211	0	0	0	12.5503	-26.1257	-222.025	2.19762	-19.8763	-3.50889	11.9569	-25.709	-176.804	0.00709593	0.893291
Q9P2H3	Q9P2H3	Intraflagellar transport protein 80 homolog	IFT80	0.773732	0.0260675	7.07537	25.3025	25.2764	18.9748	0	0	26.0501	25.3025	25.2764	+	+	+	+	+	+	+		+		39	39	39	62	62	62	88.034	0	323.31	36.5386	754	2.1407e-209	0	0	1.72431	-15.8205	-2.65584	2.3713	-20.0376	-3.84533	2.50476	-20.4115	-4.11437	0.000202247	0.609615
Q8TDR0	Q8TDR0	TRAF3-interacting protein 1	TRAF3IP1	0.784706	-0.0346191	2.11773	2.05876	3.38536	23.4542	22.6938	21.4018	25.5719	24.7526	24.7872	+	+	+	+		+	+		+		34	34	34	37.6	37.6	37.6	78.631	0	297.34	34.7497	397	2.17303e-19	5.65045e-09	8.07659e-68	2.40064	-1.80264	-3.90364	0.90899	-7.41748	-1.28359	1.93088	-2.83605	-3.01824	0.000163875	0.843192
[truncated: 7 more columns]

## Sheet: LCA5
T: Protein IDs	T: Majority protein IDs	T: Protein names	T: Gene names	AB_LCA5_x/y_Cas9_LCA5	B_LCA5_x/y_Cas9_LCA5	AB_LCA5_x/y_AB_RAF1	B_LCA5_x/y_B_RAF1	Cas9_LCA5_x/y_Cas_RAF1	AB_RAF1	B_RAF1	Cas_RAF1	AB_LCA5	B_LCA5	Cas9_LCA5	C: AB_LCA5_x/y_AB_RAF1 B significant	C: B_LCA5_x/y_B_RAF1 B significant	C: Cas9_LCA5_x/y_Cas_RAF1 B significant	C: Student's T-test Significant AB_RAF1_AB_LCA5	C: Student's T-test Significant B_RAF1_B_LCA5	C: Student's T-test Significant Cas_RAF1_Cas9_LCA5	C: AB_LCA5_x/y_Cas9_LCA5 B significant	C: B_LCA5_x/y_Cas9_LCA5 B significant	C: Student's T-test Significant AB_LCA5_Cas9_LCA5	C: Student's T-test Significant B_LCA5_Cas9_LCA5	N: Peptides	N: Razor + unique peptides	N: Unique peptides	N: Sequence coverage [%]	N: Unique + razor sequence coverage [%]	N: Unique sequence coverage [%]	N: Mol. weight [kDa]	N: Q-value	N: Score	N: Intensity	N: MS/MS count	N: AB_LCA5_x/y_AB_RAF1 Significance B	N: B_LCA5_x/y_B_RAF1 Significance B	N: Cas9_LCA5_x/y_Cas_RAF1 Significance B	N: -Log Student's T-test p-value AB_RAF1_AB_LCA5	N: Student's T-test Difference AB_RAF1_AB_LCA5	N: Student's T-test Test statistic AB_RAF1_AB_LCA5	N: -Log Student's T-test p-value B_RAF1_B_LCA5	N: Student's T-test Difference B_RAF1_B_LCA5	N: Student's T-test Test statistic B_RAF1_B_LCA5	N: -Log Student's T-test p-value Cas_RAF1_Cas9_LCA5	N: Student's T-test Difference Cas_RAF1_Cas9_LCA5	N: Student's T-test Test statistic Cas_RAF1_Cas9_LCA5	N: AB_LCA5_x/y_Cas9_LCA5 Significance B	N: B_LCA5_x/y_Cas9_LCA5 Significance B
Q8N4P2	Q8N4P2	Tetratricopeptide repeat protein 30B	TTC30B	-28.4183	-28.4183	0	0	28.4183	0	0	0	0	0	28.4183			+			+	+	+	+	+	28	9	9	54.7	20.8	20.8	76.098	0	323.31	31.9553	70	0.300978	0.199764	0	NaN	0	NaN	NaN	0	NaN	14.3275	-28.4669	-439.152	0	0
Q86WT1	Q86WT1	Tetratricopeptide repeat protein 30A	TTC30A	-10.8782	0.423827	19.8673	31.1693	8.38754	0	0	22.3579	19.8673	31.1693	30.7454	+	+	+		+	+	+		+		31	31	12	52	52	21.2	76.135	0	323.31	35.1863	376	3.27118e-266	0	8.32239e-69	1.17177	-10.9423	-1.72832	2.61805	-25.6143	-4.35064	5.74418	-8.68988	-16.1341	4.97653e-296	0.0604075
Q8WYA0	Q8WYA0	Intraflagellar transport protein 81 homolog	IFT81	-1.44481	0.136586	10.1467	9.34031	9.65884	20.6438	23.0316	22.5765	30.7905	32.3719	32.2353	+	+	+	+	+	+	+		+		54	54	54	59	59	59	79.745	0	323.31	36.4323	1029	1.11924e-71	1.26918e-36	2.73074e-90	5.70479	-9.95107	-15.8871	5.56991	-9.47877	-15.0686	6.8895	-9.45086	-25.1869	1.59088e-06	0.36453
Q96LB3	Q96LB3	Intraflagellar transport protein 74 homolog	IFT74	-1.31994	0.142012	6.8144	8.3118	7.87807	24.043	24.0076	24.2993	30.8574	32.3194	32.1774	+	+	+	+	+	+	+		+		51	51	51	77.7	77.7	77.7	69.239	0	323.31	36.4365	1126	1.02303e-33	1.45235e-29	4.93825e-61	6.42148	-6.9453	-21.0084	7.33972	-8.28477	-29.9732	6.49085	-7.8964	-21.5818	1.20754e-05	0.354909
Q13099	Q13099	Intraflagellar transport protein 88 homolog	IFT88	-1.26709	0.570486	10.2321	32.0012	7.88468	19.9315	0	23.546	30.1636	32.0012	31.4307	+	+	+	+	+	+	+		+		59	59	59	54.6	54.6	54.6	93.19	0	323.31	38.7246	1669	7.65671e-73	0	3.94186e-61	2.00024	-19.4217	-3.1431	3.14898	-27.1921	-5.57029	1.5114	-13.6431	-2.29398	2.70354e-05	0.0176156
A0AVF1	A0AVF1	Intraflagellar transport protein 56	TTC26	-1.24314	0.211062	5.67287	7.17168	6.8531	23.989	23.9444	24.0519	29.6618	31.116	30.905	+	+	+	+	+	+	+		+		25	25	25	52.5	52.5	52.5	64.177	0	241.7	35.2951	499	4.48671e-24	1.15143e-22	7.64196e-47	5.02192	-5.52214	-12.1369	1.43733	-13.0878	-2.16998	1.39936	-12.7755	-2.10668	3.85668e-05	0.246644
Q9Y366	Q9Y366	Intraflagellar transport protein 52 homolog	IFT52	-1.12551	0.321416	29.6896	31.1365	10.3527	0	0	20.4624	29.6896	31.1365	30.8151	+	+	+	+	+	+	+		+		23	23	23	50.6	50.6	50.6	49.706	0	313.53	35.1525	427	0	0	2.84356e-103	2.64604	-24.1522	-4.41019	2.71703	-25.5751	-4.56342	2.00752	-19.8859	-3.15631	0.000201436	0.125621
Q9NQC8	Q9NQC8	Intraflagellar transport protein 46 homolog	IFT46	-1.04409	0.450764	7.81365	9.01574	7.23678	21.5585	21.8512	23.1794	29.3721	30.867	30.4162	+	+	+	+	+	+	+		+		12	12	12	53.9	53.9	53.9	34.285	0	145.02	34.8438	333	1.45523e-43	2.60975e-34	6.2828e-52	6.2564	-7.99318	-19.7029	1.69133	-14.3358	-2.59914	4.44302	-7.95163	-9.62224	0.00057906	0.048968
Q9BW83	Q9BW83	Intraflagellar transport protein 27 homolog	IFT27	-1.03315	0.172507	4.18561	5.52275	5.27558	25.3231	25.1916	25.2663	29.5087	30.7144	30.5419	+	+	+	+	+	+	+		+		11	11	11	68.8	68.8	68.8	20.48	0	54.972	34.9792	234	4.48138e-14	2.10486e-14	8.81497e-29	6.11683	-4.17128	-18.6611	7.95557	-5.63148	-38.006	9.06376	-5.35086	-58.2106	0.000663643	0.303855
Q9H7X7	Q9H7X7	Intraflagellar transport protein 22 homolog	IFT22	-1.01752	0.259097	29.694	7.79933	7.82044	0	23.1713	22.8911	29.694	30.9706	30.7115	+	+	+	+	+	+	+		+		11	11	11	75.7	75.7	75.7	20.835	0	323.31	35.0988	325	0	2.41793e-26	3.48899e-60	2.33568	-23.4007	-3.77512	1.52944	-13.5804	-2.3243	1.52565	-13.415	-2.31792	0.000804657	0.186526
Q9Y547	Q9Y547	Intraflagellar transport protein 25 homolog	HSPB11	-0.937563	0.263018	4.19435	5.4328	4.89475	24.0029	23.965	24.24	28.1972	29.3978	29.1348	+	+	+	+	+		+		+		4	4	4	36.1	36.1	36.1	16.297	0	106.47	33.6091	141	3.99115e-14	5.19695e-14	4.17436e-25	4.46141	-4.5012	-9.69422	7.95852	-5.43416	-38.0493	1.20879	-10.9191	-1.78994	0.00206869	0.182145
Q8TDR0	Q8TDR0	TRAF3-interacting protein 1	TRAF3IP1	-0.335378	0.884357	6.45517	8.43526	8.84289	23.4542	22.6938	21.4018	29.9094	31.1291	30.2447	+	+	+	+	+	+		+		+	34	34	34	37.6	37.6	37.6	78.631	0	297.34	34.7497	397	1.69362e-30	2.2731e-30	3.69701e-76	4.95279	-6.09719	-11.8078	1.58149	-13.9396	-2.41208	4.18615	-8.19178	-8.66531	0.298743	0.000593279
Q96AJ1	Q96AJ1	Clusterin-associated protein 1	CLUAP1	-0.326901	0.430307	31.2717	32.0289	13.2665	0	0	18.332	31.2717	32.0289	31.5986	+	+	+	+	+	+				+	26	26	26	55.4	55.4	55.4	48.125	0	323.31	35.921	403	0	0	1.68781e-167	2.92154	-26.0469	-5.02337	11.8413	-32.0983	-169.128	2.34012	-21.6722	-3.78383	0.312303	0.0574704
Q9NWB7	Q9NWB7	Intraflagellar transport protein 57 homolog	IFT57	-0.274954	0.458917	9.91076	11.1132	11.2334	21.6258	21.1573	20.5781	31.5366	32.2704	31.8115	+	+	+	+	+	+					25	25	25	66	66	66	49.108	0	323.31	36.23	604	1.65441e-68	1.18696e-50	4.94809e-121	6.99507	-9.85329	-26.2367	1.94781	-16.3846	-3.04856	1.96224	-16.1353	-3.07447	0.404095	0.0458869
Q9P2H3	Q9P2H3	Intraflagellar transport protein 80 homolog	IFT80	-0.19988	0.533749	12.9874	32.6958	32.1621	18.9748	0	0	31.9622	32.6958	32.1621	+	+	+	+	+	+				+	39	39	39	62	62	62	88.034	0	323.31	36.5386	754	1.30724e-115	0	0	2.25881	-21.6114	-3.62575	3.03483	-27.5469	-5.29087	3.11814	-27.229	-5.49378	0.561998	0.0244864
Q9UG01	Q9UG01	Intraflagellar transport protein 172 homolog	IFT172	-0.175264	0.462744	9.18147	10.2335	9.55945	24.8246	24.4106	24.6219	34.0061	34.6441	34.1814	+	+	+	+	+	+				+	117	117	117	73.2	73.2	73.2	197.57	0	323.31	38.5735	2400	3.55728e-59	2.13872e-43	1.67263e-88	6.18834	-9.35498	-19.188	8.49193	-10.2602	-46.7211	7.44893	-9.61879	-31.2635	0.619584	0.0444977
Q8IY31	Q8IY31	Intraflagellar transport protein 20 homolog	IFT20	-0.0626613	0.600248	30.9338	31.5967	30.9964	0	0	0	30.9338	31.5967	30.9964	+	+	+	+	+	+				+	13	13	13	73.5	73.5	73.5	15.28	0	323.31	35.4604	211	0	0	0	10.4259	-30.8106	-98.2318	2.72879	-26.0064	-4.58909	13.7365	-31.0358	-350.037	0.908617	0.0133529
Q86VQ0	Q86VQ0	Lebercilin	LCA5	0.468435	0.423596	12.6922	12.5264	12.621	24.8572	24.9782	24.46	37.5494	37.5045	37.0809	+	+	+	+	+	+					78	78	78	75.9	75.9	75.9	80.553	0	323.31	41.7214	7008	1.51181e-110	1.58887e-63	6.42742e-152	9.41094	-12.7595	-66.5189	9.12443	-12.5874	-59.584	8.09071	-12.7314	-40.0363	0.0237445	0.0605145
[truncated: 7 more columns]
